# Supplementary material for: Are measurements of systolic myocardial velocities and displacement with colour and spectral Tissue Doppler compatible?
Source: Cardiovasc Ultrasound. 2009 Jun 23;7:29. doi: 10.1186/1476-7120-7-29 (PMC2715374; doi:10.1186/1476-7120-7-29)
Supplement: Additional file 1 — Table 1. Systolic myocardial velocities (cm/sec) obtained by colour and spectral TD at septal and lateral wall. The data presented provide myocardial longitudinal systolic velocities measured with colour and spectral TD at the septal and lateral wall site of mitral annulus. [file 1476-7120-7-29-S1.xls]

## Sheet: table 1
	Table 1. Systolic myocardial velocities (cm/sec) obtained by colour
		and spectral TD at septal and lateral wall
					Septal wall		Lateral wall*
					mean±SD (n)		mean±SD (n)
		Colour TD	PSV		7.26 ± 1.05 (24)1		8.96 ± 1.18 (24)1
		Spectral TD	SVmean		7.36 ± 1.03 (24)1		9.04 ± 1.54 (21)1
			SVmax		8.76 ± 1.18 (24)2		11.05 ± 1.67 (21)2
			SVmin		5.94 ± 0.90 (24)		6.98 ± 1.52 (21)
	1p<0.001 vs. spectral SVmax and SVmin; 2p<0.001 vs. spectral SVmin
	* In 3 cases, measurements of spectral velocities at the lateral LV wall could not be
	successfully performed due to suboptimal image quality
