# Supplementary material for: Are measurements of systolic myocardial velocities and displacement with colour and spectral Tissue Doppler compatible?
Source: Cardiovasc Ultrasound. 2009 Jun 23;7:29. doi: 10.1186/1476-7120-7-29 (PMC2715374; doi:10.1186/1476-7120-7-29)
Supplement: Additional file 2 — Table 2. Mean differences and limits of agreement (mean ± 2SD) for colour TD and spectral TD systolic velocities (cm/sec) at septal and lateral wall. The data presented give mean values and limits of agreement for myocardial systolic velocities measured with colour TD and spectral TD at the outer and the inner border of the spectral envelope as well as with the mean spectral TD procedure. [file 1476-7120-7-29-S2.xls]

## Sheet: table 2
	Table 2. Mean differences and limits of agreement (mean±2SD) for colour TD and
	spectral TD systolic velocities (cm/sec) at septal and lateral wall
		Colour TD PSV	Colour TD PSV	Colour TD PSV
		minus	minus	minus
		Spectral TD SVmean	Spectral TD SVmax	Spectral TD SVmin
	SEPTAL WALL
	Mean difference ± SD	-0.10±0.54	-1.52±0.70	1.32±0.60
	Limits of agreement	-1.18 to 0.98	-2.92 to 0.12	-0.12 to 2.52
	Correlation (R)	0.87	0.81	0.82
	LATERAL WALL
	Mean difference ± SD	-0.09±0.97	-2.1±1.00	1.97±1.13
	Limits of agreement	-2.03 to 1.85	-4.1 to 0.10	-0.29 to 4.23
	Correlation (R)	0.78	0.81	0.68
