# Supplementary material for: Are measurements of systolic myocardial velocities and displacement with colour and spectral Tissue Doppler compatible?
Source: Cardiovasc Ultrasound. 2009 Jun 23;7:29. doi: 10.1186/1476-7120-7-29 (PMC2715374; doi:10.1186/1476-7120-7-29)
Supplement: Additional file 3 — Table 3. Interobserver variability of colour and spectral TD derived myocardial velocity and displacement values at septal wall. The data presented give the interboserver variability values (%) for myocardial systolic velocity and displacement measurements obtained with colour TD, M-mode, as well as the three different spectral TD Doppler procedures at the basal septal wall site of mitral annulus. [file 1476-7120-7-29-S3.xls]

## Sheet: table 31
		Table 3. Interobserver variability of colour and spectral TD
		derived myocardial velocity and displacement
		values at septal wall
		VELOCITY					DISPLACEMENT
		Colour TD	PSV	5.3%			Colour TD	SEmd	6.9%
		Spectral TD	SVmean	10.5%			Spectral TD	VTImean	7.04%
			SVmax	11.1%				VTImax	8.03%
			SVmin	10.1%				VTImin	6.61%
							M-mode	MAM	7.4%
