# Supplementary material for: Are measurements of systolic myocardial velocities and displacement with colour and spectral Tissue Doppler compatible?
Source: Cardiovasc Ultrasound. 2009 Jun 23;7:29. doi: 10.1186/1476-7120-7-29 (PMC2715374; doi:10.1186/1476-7120-7-29)
Supplement: Additional file 5 — Table 5. Mean differences and limits of agreement (mean ± 2SD) for colour TD, spectral TD and M-mode measurements of LV myocardial longitudinal displacement during systolic ejection.The data presented give mean differences and limits of agreement for myocardial longitudinal systolic displacement values at the basal septal and lateral wall site measured by colour TD, M-mode and different spectral TD procedures. [file 1476-7120-7-29-S5.xls]

## Sheet: table 5
	Table 5. Mean differences and limits of agreement (mean±2SD) for colour TD, spectral TD and M-mode measurements of LV myocardial longitudinal
	displacement during systolic ejection
		M-mode MAM	M-mode MAM	M-mode MAM	M-mode MAM	Colour TD SEmd	Colour TD SEmd	Colour TD SEmd
		minus	minus	minus	minus	minus	minus	minus
		Colour TD SEmd	Spectral TD VTImean	Spectral TD VTImax	Spectral TD VTImin	Spectral TD VTImean	Spectral TD VTImax	Spectral TD VTImin
		(mm)	(mm)	(mm)	(mm)	(mm)	(mm)	(mm)
	SEPTAL WALL
	Mean difference ± SD	-0.09±0.95	-0.03±1.07	-4.41±1.72	3.68±0.99	-0.22±0.74	-4.32±1.53	3.77±1.00
	Limits of agreement	-1.99 to 1.81	-2.44 to 1.84	-7.85 to 0.97	-1.7 to 5.66	-1.7 to 1.26	-7.38 to 1.26	-1.77 to 5.77
	Correlation (R)	0.83	0.82	0.73	0.83	0.92	0.81	0.82
	LATERAL WALL
	Mean difference ± SD	0.66±0.83	0.74±1.25	-3.75±1.85	5.27±2.03	0.02±0.86	-4.47±1.59	4.56±1.63
	Limits of agreement	-1.0 to 2.32	-1.76 to 3.24	-7.45 to 0.05	-1.21 to 9.33	-1.7 to 1.74	-7.65 to 1.29	-1.3 to 7.82
	Correlation (R)	0.94	0.82	0.74	0.57	0.83	0.77	0.61
